# Supplementary material
Source: Springer Nature journal article supplement (https://www.springermedizin.de/resource/supplementary/13023_2012_406_MOESM5_ESM.pdf/9642222)

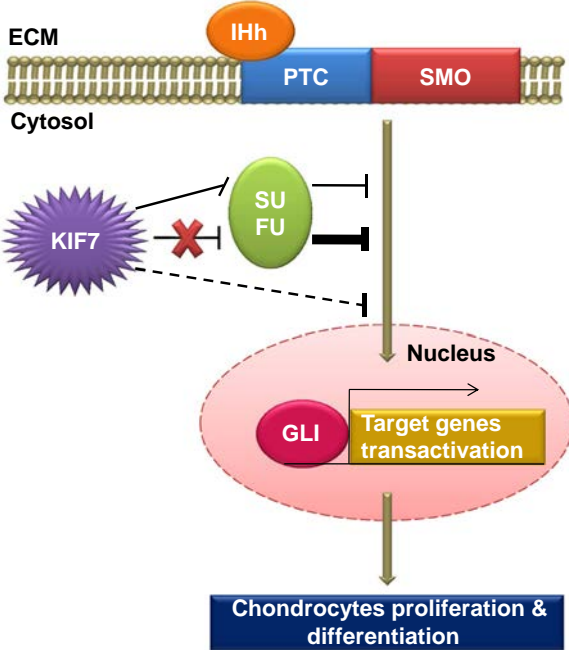

Supplement: MOESM5 [file 9642222]
